# Supplementary material
Source: PubMed Central journal article supplement (PMC8640745)
Supplement: pnas.2112267118.sapp.pdf [file pnas.2112267118.sapp.pdf]

## **Supplementary Information for**

### **Molecular Structure of an Open Human $K_{ATP}$ Channel**

Chen Zhao and Roderick MacKinnon

\*Roderick MacKinnon

<sup>a</sup>Laboratory of Molecular Neurobiology and Biophysics, Howard Hughes Medical Institute, The Rockefeller University, New York, NY 10065

**Email:** [mackinn@rockefeller.edu](mailto:mackinn@rockefeller.edu)

**This PDF file includes:**

Figures S1 to S6

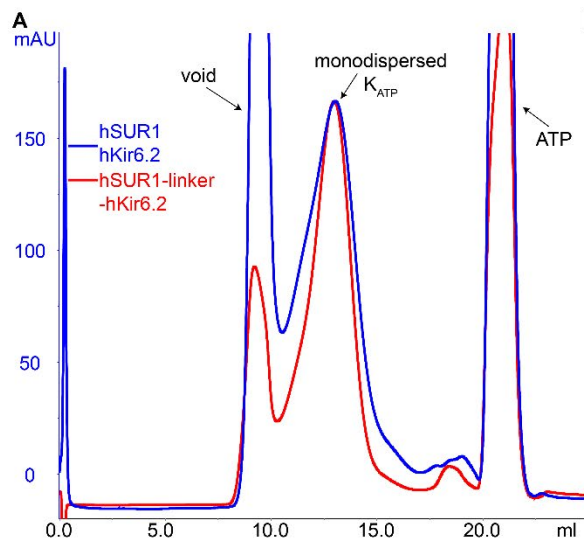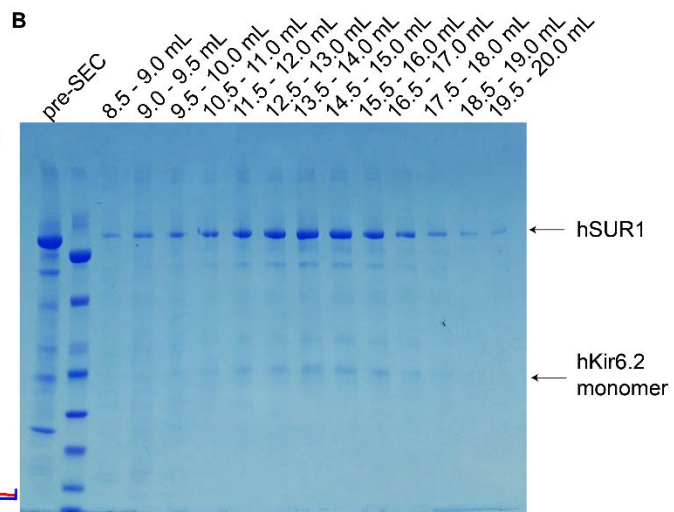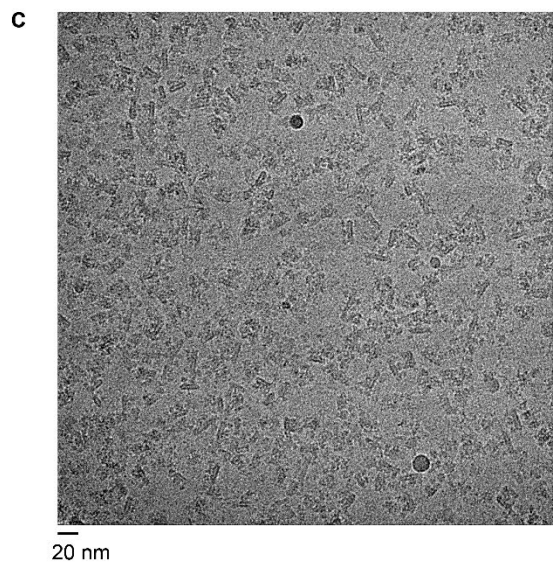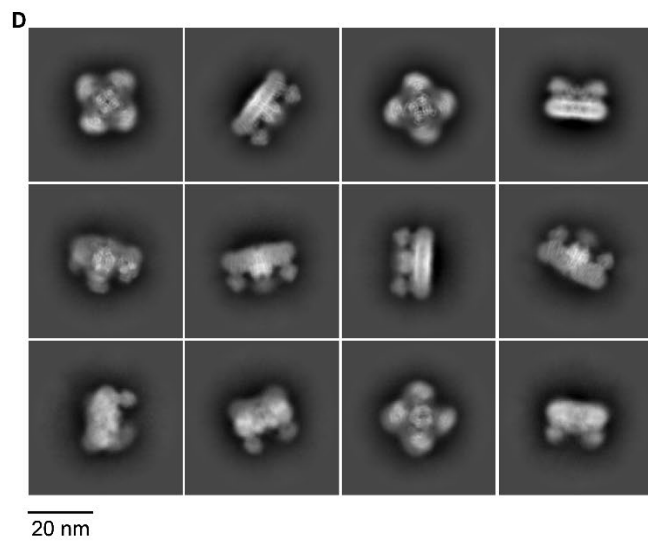

**Fig. S1. Sample preparation and cryo-EM analysis of hK<sub>ATP</sub>.** (A) Comparison of gel-filtration profile of different WT hK<sub>ATP</sub> constructs. Samples were separated by a superpose 6 increase column. Trace for hK<sub>ATP</sub> expressed as independent polypeptides is shown in blue and trace for hK<sub>ATP</sub> expressed with a covalent linker between hSUR and hKir is shown in red. (B) SDS-PAGE of fractions collected from gel-filtration in (A). Pre-SEC: sample before size-exclusion (gel-filtration) chromatography. Retention volumes for fractions are labeled on top of corresponding gel lanes. (C) Representative micrograph of hK<sub>ATP</sub> (C166S<sub>Kir</sub>, G334D<sub>Kir</sub>) in GDN in the presence of 10 mM Mg<sup>2+</sup>-ATP and 0.1 mM Mg<sup>2+</sup>-ADP. This specific micrograph was collected at a defocus value of -2 μm with a total dose of 56 e<sup>-</sup>/Å<sup>2</sup>. The image was lowpass-filtered to 15 Å. (D) Selected 2D class averages.

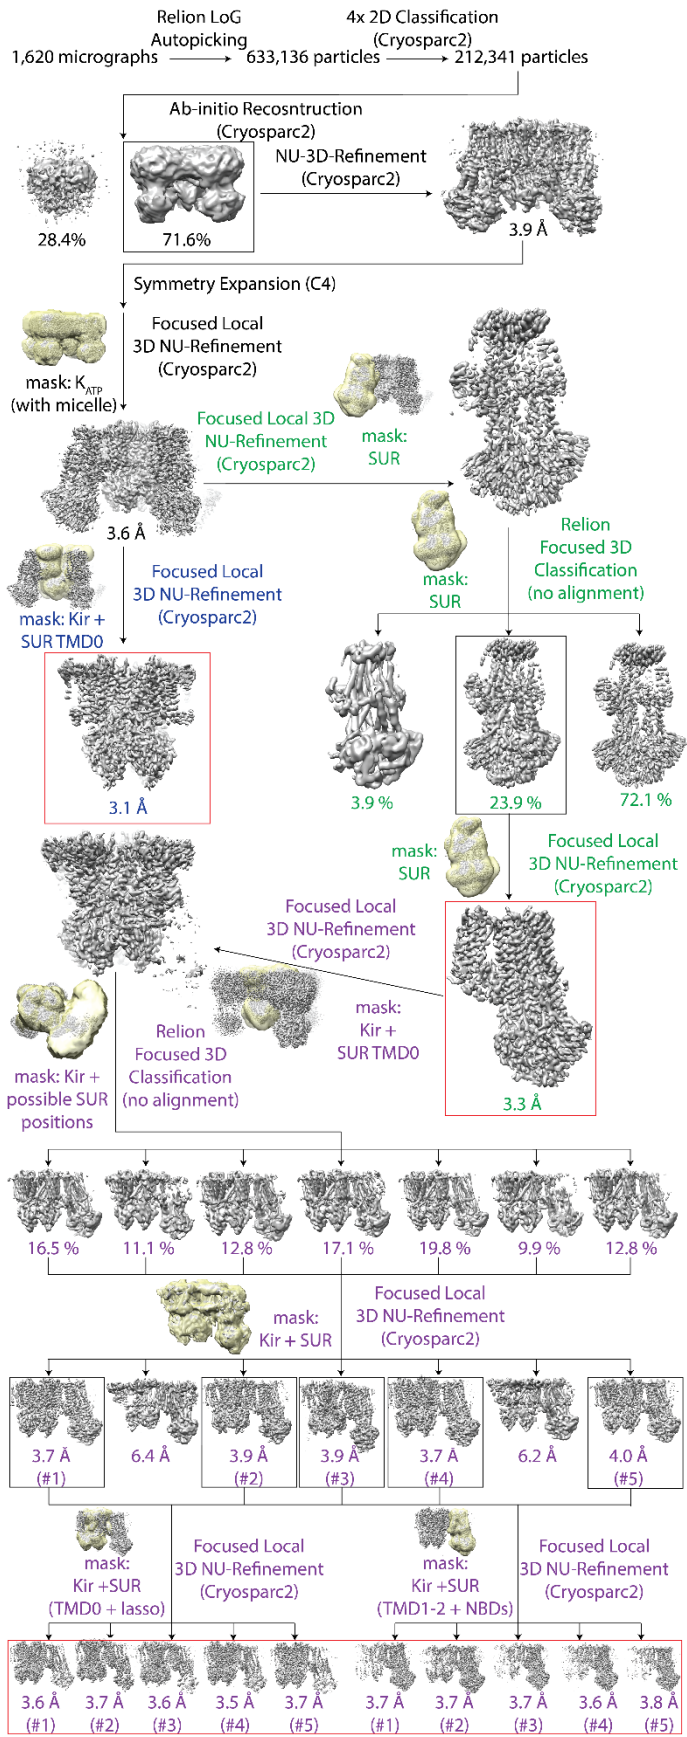

**Fig. S2. Cryo-EM data processing procedure.** Cryo-EM maps are shown in grey and masks are shown in yellow. Steps for obtaining hKir6.2 structure by focused refinement are colored in blue, steps for obtaining hSUR1 structure by focused refinement are colored in green, and steps for obtaining hKir6.2-hSUR1 structures with hSUR1 at different positions relative to hKir6.2 are colored in purple. Classes that were selected for further data processing are indicated by black boxes. Cryo-EM maps that were used for final model building are indicated by red boxes.

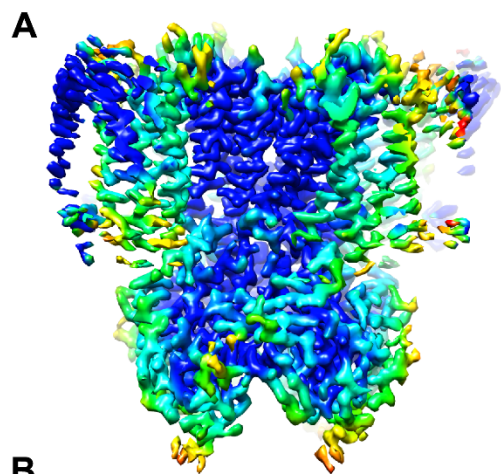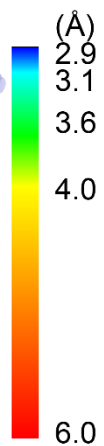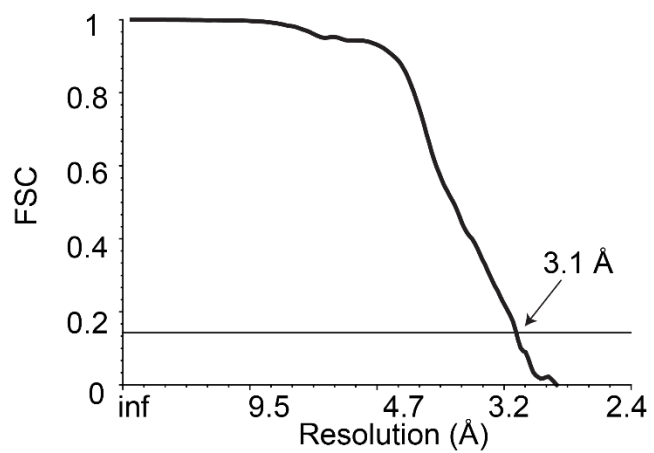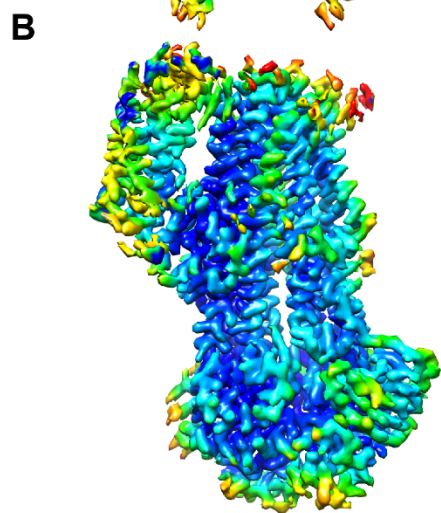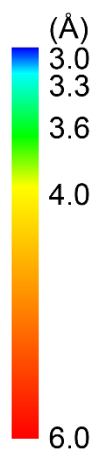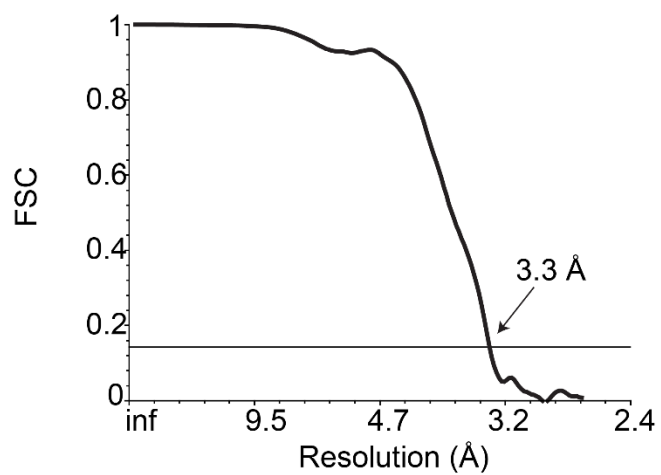

**Fig. S3. Local resolution and FSC curves for (A) hKir6.2 and (B) hSUR1.** Local resolution was calculated by Cryosparc V2.

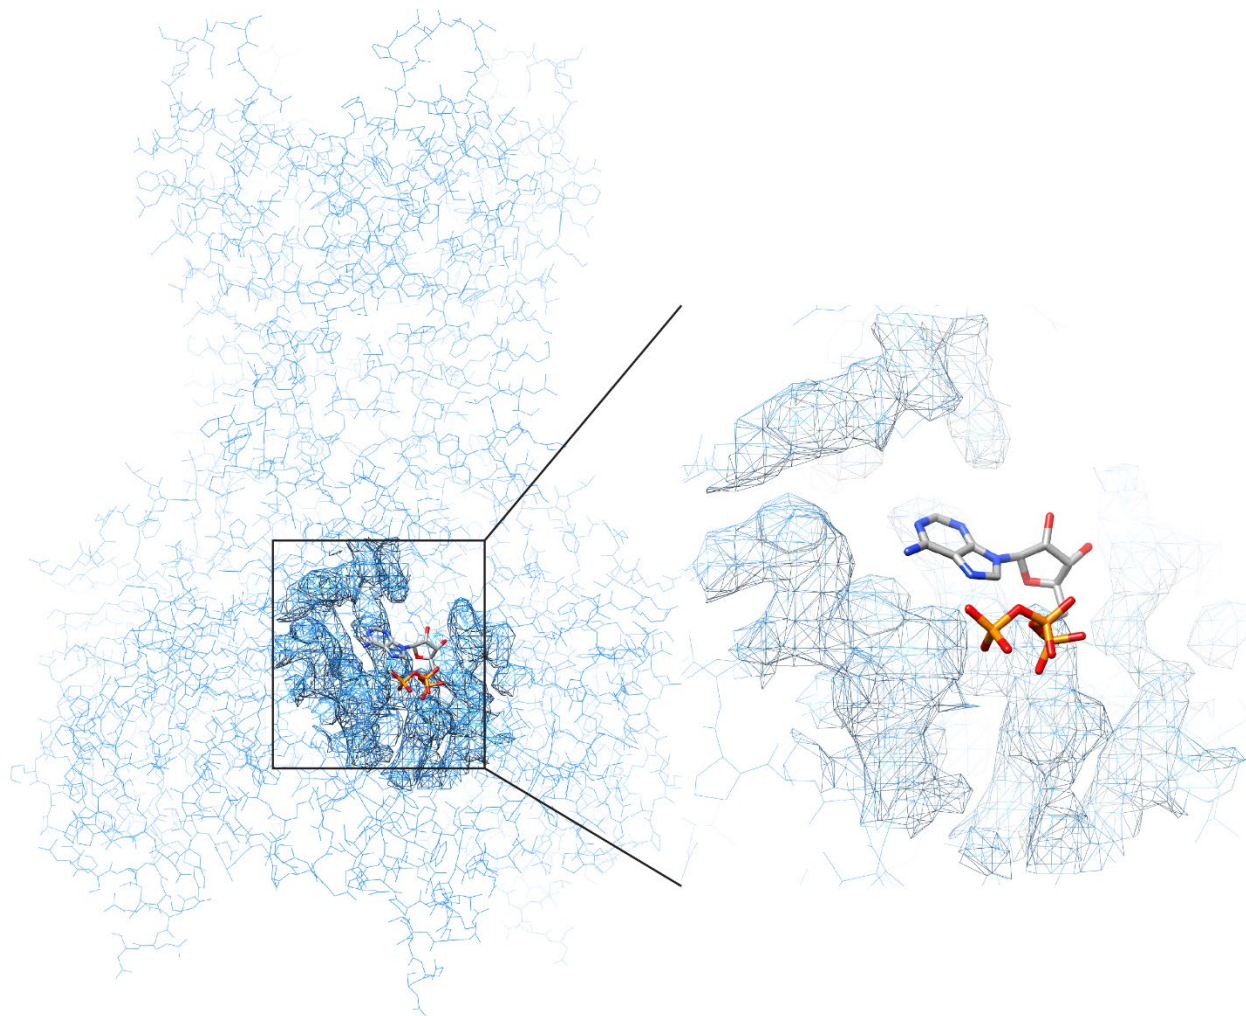



**Fig. S4. ATP is absent in its inhibitory binding site in hKir (C166S, G334D).** ATP molecule in hKir6.2 (WT) is shown as sticks. Cryo-EM density of hKir6.2 (C166S, G334D) within 10 Å radius centered at the location of ATP in hKir6.2 (WT) is shown as meshes.

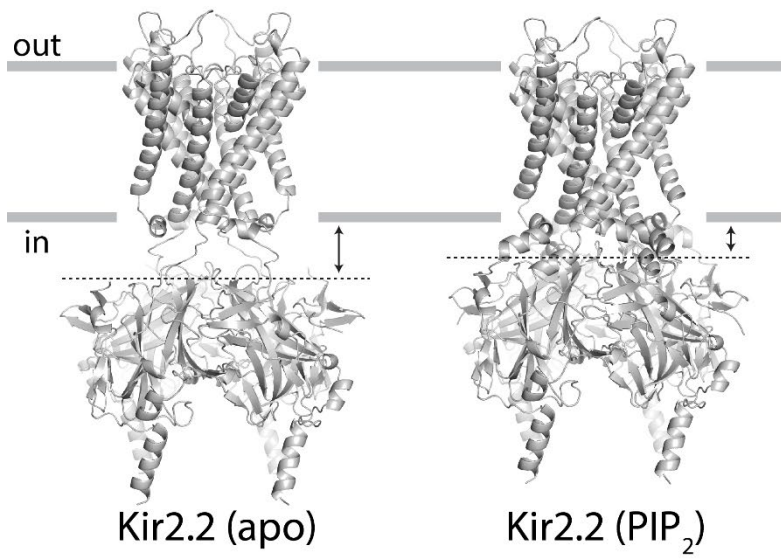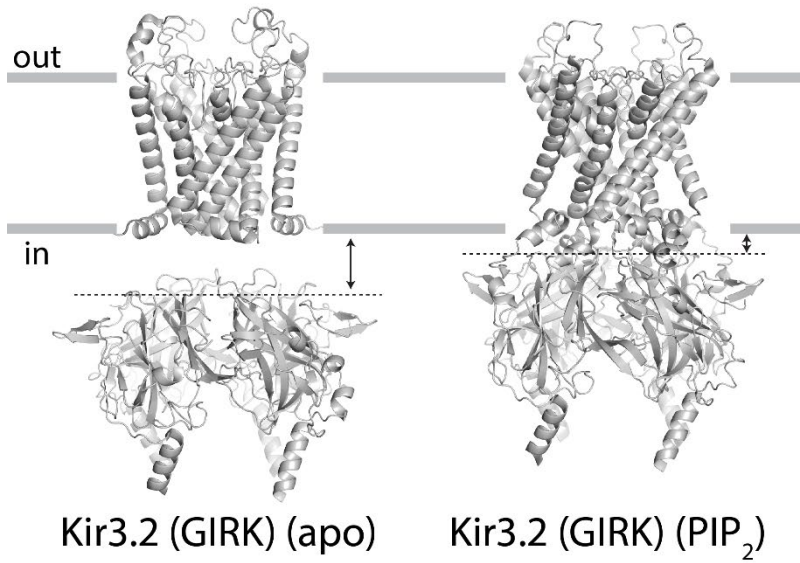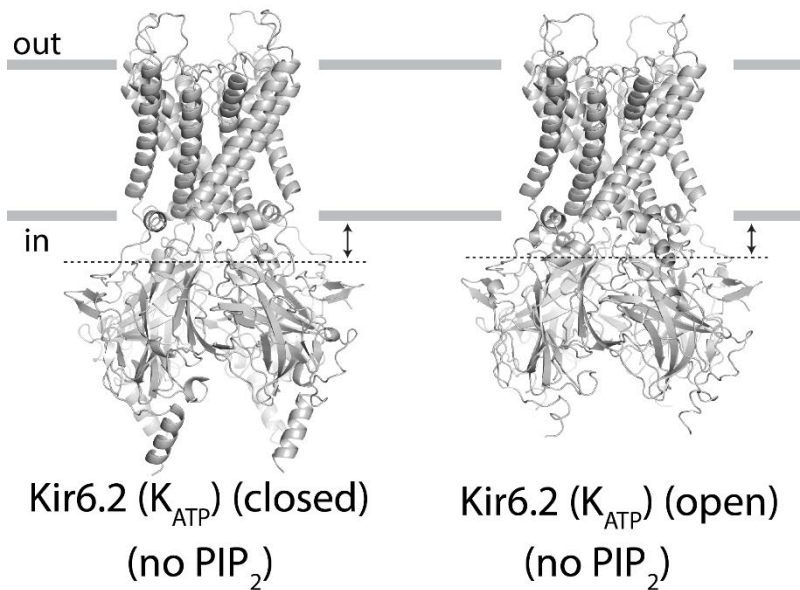

**Fig. S5. PIP<sub>2</sub>-induced conformational changes in Kir channels.** PDB IDs: Kir2.2 (apo) 3JYC, Kir2.2 (PIP<sub>2</sub>) 3SPI, Kir3.2 (apo) 6XIS, Kir3.2 (PIP<sub>2</sub>) 6XIT, Kir6.2 (closed, no PIP<sub>2</sub>) 6C3P.

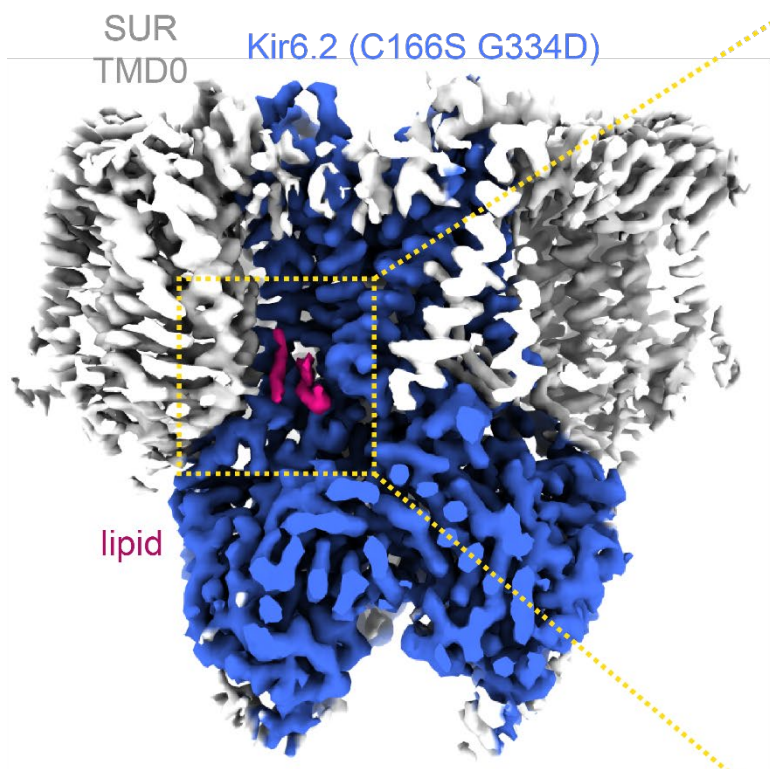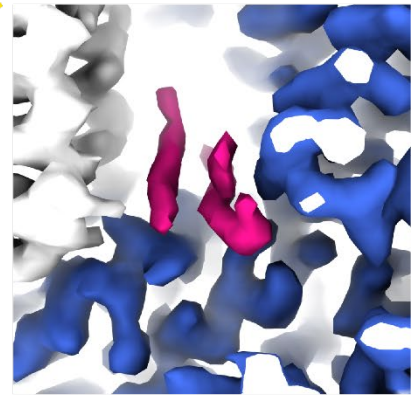

90°

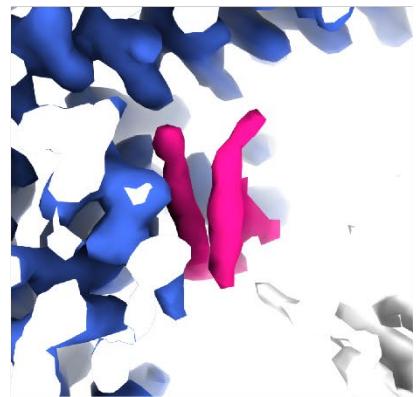

**Fig. S6. Lipid densities in the potential PIP<sub>2</sub> binding pocket in hKir6.2 (C166S G334D).** Lipid densities are colored in magenta, hKir6.2 (C166S G334D) is colored in blue, and TMD0 from SUR is colored in grey.
